# Supplementary material for: A Compound Hop Index for Assessing Soccer Players’ Performance
Source: MDPI journal article supplement (doi:10.3390/jcm11010255), 2022-01-04
Supplement: s1 [file s1]

**Table S1.** List of calculated CHI for particular players of a given team.

| Consecutive players | CHI   |
|---------------------|-------|
| Player 1            | 0.85  |
| Player 2            | 0.53  |
| Player 3            | 0.35  |
| Player 4            | −0.63 |
| Player 5            | −0.29 |
| Player 6            | 0.09  |
| Player 7            | −1.32 |
| Player 8            | 0.19  |
| Player 9            | −0.17 |
| Player 10           | 0.03  |
| Player 11           | 0.37  |
| Player 12           | 0.32  |
| Player 13           | 0.60  |
| Player 14           | −2.50 |
| Player 15           | 0.54  |
| Player 16           | 0.27  |
| Player 17           | −1.43 |
| Player 18           | 0.02  |
| Player 19           | −0.16 |
| Player 20           | −0.76 |
| Player 21           | 0.29  |
| Player 22           | 0.68  |
| Player 23           | −0.49 |
| Player 24           | −0.37 |
| Player 25           | 0.14  |
| Player 26           | −0.32 |
| Player 27           | −0.07 |
| Player 28           | 0.42  |
| Player 29           | 0.34  |
| Player 30           | 0.60  |
| Player 31           | 0.69  |
| Player 32           | 0.77  |
| Player 33           | −0.96 |
| Player 34           | 0.06  |
| Player 35           | −0.11 |
| Player 36           | 1.20  |
| Player 37           | 0.30  |
| Player 38           | −0.58 |
| Player 39           | −0.03 |
| Player 40           | 0.05  |
| Player 41           | 0.62  |
| Player 42           | −0.45 |
| Player 43           | 0.31  |
