# Supplementary material for: A Compound Hop Index for Assessing Soccer Players’ Performance
Source: MDPI journal article supplement (doi:10.3390/jcm11010255), 2022-01-04
Supplement: s1 [file s1]

# Description of the Calculation of Compound Hop Index\* in Microsoft Office Excel

\* The description refers to the CHI.b in the present manuscript.

1. Enter data as presented in Figure S1 with one athlete of a given team per row, with body height expressed in meters (m) and test results in consecutive columns across the top, including single-leg hop test distance separately for left and right leg (m), triple hop test distance separately for left and right leg (m), and six-meter timed hop test time separately for left and right leg expressed in seconds (s).

|    | A                   | B               | C                                         | D                                          | E                                     | F                                      | G                                          | H                                           | I |
|----|---------------------|-----------------|-------------------------------------------|--------------------------------------------|---------------------------------------|----------------------------------------|--------------------------------------------|---------------------------------------------|---|
| 1  | Consecutive players | Body height [m] | Single-leg hop test distance left leg [m] | Single-leg hop test distance right leg [m] | Triple hop test distance left leg [m] | Triple hop test distance right leg [m] | Six-meter timed hop test time left leg [s] | Six-meter timed hop test time right leg [s] |   |
| 2  | Player 1            | 1.83            | 2.33                                      | 2.30                                       | 7.65                                  | 7.98                                   | 1.34                                       | 1.28                                        |   |
| 3  | Player 2            | 1.81            | 2.28                                      | 2.32                                       | 6.95                                  | 7.36                                   | 1.31                                       | 1.29                                        |   |
| 4  | Player 3            | 1.80            | 2.11                                      | 2.13                                       | 6.88                                  | 6.85                                   | 1.34                                       | 1.32                                        |   |
| 5  | Player 4            | 1.91            | 2.01                                      | 2.06                                       | 6.49                                  | 7.05                                   | 1.35                                       | 1.39                                        |   |
| 6  | Player 5            | 1.84            | 1.99                                      | 1.95                                       | 6.63                                  | 6.51                                   | 1.44                                       | 1.43                                        |   |
| 7  | Player 6            | 1.82            | 2.11                                      | 2.10                                       | 6.69                                  | 6.65                                   | 1.40                                       | 1.46                                        |   |
| 8  | Player 7            | 1.85            | 2.04                                      | 1.83                                       | 6.82                                  | 6.16                                   | 1.48                                       | 1.61                                        |   |
| 9  | Player 8            | 1.80            | 2.10                                      | 2.13                                       | 6.88                                  | 7.02                                   | 1.45                                       | 1.36                                        |   |
| 10 | Player 9            | 1.83            | 2.14                                      | 2.01                                       | 6.77                                  | 7.08                                   | 1.34                                       | 1.36                                        |   |
| 11 | Player 10           | 1.88            | 2.12                                      | 2.20                                       | 6.97                                  | 7.10                                   | 1.34                                       | 1.32                                        |   |
| 12 |                     |                 |                                           |                                            |                                       |                                        |                                            |                                             |   |

Figure S1 The method of preparing data from individual tests performed on the example of a 10-person team.

2. Normalize the single-leg hop test distance (m) and triple hop test distance (m) separately for the right and left legs by dividing the test result of the particular athlete by their body height (m) as presented in Figure S2 and Figure S3. The normalized values are expressed in  $\text{m} \cdot \text{m}^{-1}$ .

|    | A                   | B               | C                                         | D                                          | E                                     | F                                      | G                                          | H                                           | I                                                                                   | J |
|----|---------------------|-----------------|-------------------------------------------|--------------------------------------------|---------------------------------------|----------------------------------------|--------------------------------------------|---------------------------------------------|-------------------------------------------------------------------------------------|---|
| 1  | Consecutive players | Body height [m] | Single-leg hop test distance left leg [m] | Single-leg hop test distance right leg [m] | Triple hop test distance left leg [m] | Triple hop test distance right leg [m] | Six-meter timed hop test time left leg [s] | Six-meter timed hop test time right leg [s] | Normalized single-leg hop test distance left leg [ $\text{m} \cdot \text{m}^{-1}$ ] |   |
| 2  | Player 1            | 1.83            | 2.33                                      | 2.30                                       | 7.65                                  | 7.98                                   | 1.34                                       | 1.28                                        | $=C2/B2$                                                                            |   |
| 3  | Player 2            | 1.81            | 2.28                                      | 2.32                                       | 6.95                                  | 7.36                                   | 1.31                                       | 1.29                                        |                                                                                     |   |
| 4  | Player 3            | 1.80            | 2.11                                      | 2.13                                       | 6.88                                  | 6.85                                   | 1.34                                       | 1.32                                        |                                                                                     |   |
| 5  | Player 4            | 1.91            | 2.01                                      | 2.06                                       | 6.49                                  | 7.05                                   | 1.35                                       | 1.39                                        |                                                                                     |   |
| 6  | Player 5            | 1.84            | 1.99                                      | 1.95                                       | 6.63                                  | 6.51                                   | 1.44                                       | 1.43                                        |                                                                                     |   |
| 7  | Player 6            | 1.82            | 2.11                                      | 2.10                                       | 6.69                                  | 6.65                                   | 1.40                                       | 1.46                                        |                                                                                     |   |
| 8  | Player 7            | 1.85            | 2.04                                      | 1.83                                       | 6.82                                  | 6.16                                   | 1.48                                       | 1.61                                        |                                                                                     |   |
| 9  | Player 8            | 1.80            | 2.10                                      | 2.13                                       | 6.88                                  | 7.02                                   | 1.45                                       | 1.36                                        |                                                                                     |   |
| 10 | Player 9            | 1.83            | 2.14                                      | 2.01                                       | 6.77                                  | 7.08                                   | 1.34                                       | 1.36                                        |                                                                                     |   |
| 11 | Player 10           | 1.88            | 2.12                                      | 2.20                                       | 6.97                                  | 7.10                                   | 1.34                                       | 1.32                                        |                                                                                     |   |
| 12 |                     |                 |                                           |                                            |                                       |                                        |                                            |                                             |                                                                                     |   |

Figure S2 The method of normalizing the single-leg hop test distance result by dividing it by the athlete's body height.

|    | A                   | B               | C                                         | D                                          | E                                     | F                                      | G                                          | H                                           | I                                                                                 | J                                                                                  | K                                                                             | L                                                                              | M |
|----|---------------------|-----------------|-------------------------------------------|--------------------------------------------|---------------------------------------|----------------------------------------|--------------------------------------------|---------------------------------------------|-----------------------------------------------------------------------------------|------------------------------------------------------------------------------------|-------------------------------------------------------------------------------|--------------------------------------------------------------------------------|---|
|    | Consecutive players | Body height [m] | Single-leg hop test distance left leg [m] | Single-leg hop test distance right leg [m] | Triple hop test distance left leg [m] | Triple hop test distance right leg [m] | Six-meter timed hop test time left leg [s] | Six-meter timed hop test time right leg [s] | Normalized single-leg hop test distance left leg [ $\text{m}\cdot\text{m}^{-1}$ ] | Normalized single-leg hop test distance right leg [ $\text{m}\cdot\text{m}^{-1}$ ] | Normalized triple hop test distance left leg [ $\text{m}\cdot\text{m}^{-1}$ ] | Normalized triple hop test distance right leg [ $\text{m}\cdot\text{m}^{-1}$ ] |   |
| 1  |                     |                 |                                           |                                            |                                       |                                        |                                            |                                             |                                                                                   |                                                                                    |                                                                               |                                                                                |   |
| 2  | Player 1            | 1.83            | 2.33                                      | 2.30                                       | 7.65                                  | 7.98                                   | 1.34                                       | 1.28                                        | 1.27                                                                              | 1.26                                                                               | 4.18                                                                          | 4.36                                                                           |   |
| 3  | Player 2            | 1.81            | 2.28                                      | 2.32                                       | 6.95                                  | 7.36                                   | 1.31                                       | 1.29                                        | 1.26                                                                              | 1.28                                                                               | 3.84                                                                          | 4.07                                                                           |   |
| 4  | Player 3            | 1.80            | 2.11                                      | 2.13                                       | 6.88                                  | 6.85                                   | 1.34                                       | 1.32                                        | 1.17                                                                              | 1.18                                                                               | 3.82                                                                          | 3.81                                                                           |   |
| 5  | Player 4            | 1.91            | 2.01                                      | 2.06                                       | 6.49                                  | 7.05                                   | 1.35                                       | 1.39                                        | 1.05                                                                              | 1.08                                                                               | 3.40                                                                          | 3.69                                                                           |   |
| 6  | Player 5            | 1.84            | 1.99                                      | 1.95                                       | 6.63                                  | 6.51                                   | 1.44                                       | 1.43                                        | 1.08                                                                              | 1.06                                                                               | 3.60                                                                          | 3.54                                                                           |   |
| 7  | Player 6            | 1.82            | 2.11                                      | 2.10                                       | 6.69                                  | 6.65                                   | 1.40                                       | 1.46                                        | 1.16                                                                              | 1.15                                                                               | 3.68                                                                          | 3.65                                                                           |   |
| 8  | Player 7            | 1.85            | 2.04                                      | 1.83                                       | 6.82                                  | 6.16                                   | 1.48                                       | 1.61                                        | 1.10                                                                              | 0.99                                                                               | 3.69                                                                          | 3.33                                                                           |   |
| 9  | Player 8            | 1.80            | 2.10                                      | 2.13                                       | 6.88                                  | 7.02                                   | 1.45                                       | 1.36                                        | 1.17                                                                              | 1.18                                                                               | 3.82                                                                          | 3.90                                                                           |   |
| 10 | Player 9            | 1.83            | 2.14                                      | 2.01                                       | 6.77                                  | 7.08                                   | 1.34                                       | 1.36                                        | 1.17                                                                              | 1.10                                                                               | 3.70                                                                          | 3.87                                                                           |   |
| 11 | Player 10           | 1.88            | 2.12                                      | 2.20                                       | 6.97                                  | 7.10                                   | 1.34                                       | 1.32                                        | 1.13                                                                              | 1.17                                                                               | 3.71                                                                          | 3.78                                                                           |   |
| 12 |                     |                 |                                           |                                            |                                       |                                        |                                            |                                             |                                                                                   |                                                                                    |                                                                               |                                                                                |   |

Figure S3 Calculated normalized values for single-leg and triple hop test distances separately for left and right legs.

3. Calculate the Limb Symmetry Index, LSI for single-leg hop test distance, triple hop test distance, and six-meter timed hop test time by dividing the worse score by the better score, multiplied by 100 as presented in Figure S4 and Figure S5.

|    | A                   | B               | C                                         | D                                          | E                                     | F                                      | G                                          | H                                           | I                                                                                 | J                                                                                  | K                                                                             | L                                                                              | M                                | N |
|----|---------------------|-----------------|-------------------------------------------|--------------------------------------------|---------------------------------------|----------------------------------------|--------------------------------------------|---------------------------------------------|-----------------------------------------------------------------------------------|------------------------------------------------------------------------------------|-------------------------------------------------------------------------------|--------------------------------------------------------------------------------|----------------------------------|---|
|    | Consecutive players | Body height [m] | Single-leg hop test distance left leg [m] | Single-leg hop test distance right leg [m] | Triple hop test distance left leg [m] | Triple hop test distance right leg [m] | Six-meter timed hop test time left leg [s] | Six-meter timed hop test time right leg [s] | Normalized single-leg hop test distance left leg [ $\text{m}\cdot\text{m}^{-1}$ ] | Normalized single-leg hop test distance right leg [ $\text{m}\cdot\text{m}^{-1}$ ] | Normalized triple hop test distance left leg [ $\text{m}\cdot\text{m}^{-1}$ ] | Normalized triple hop test distance right leg [ $\text{m}\cdot\text{m}^{-1}$ ] | Single-leg hop test distance LSI |   |
| 1  |                     |                 |                                           |                                            |                                       |                                        |                                            |                                             |                                                                                   |                                                                                    |                                                                               |                                                                                |                                  |   |
| 2  | Player 1            | 1.83            | 2.33                                      | 2.30                                       | 7.65                                  | 7.98                                   | 1.34                                       | 1.28                                        | 1.27                                                                              | 1.26                                                                               | 4.18                                                                          | 4.36                                                                           | $=(J/I)*100$                     |   |
| 3  | Player 2            | 1.81            | 2.28                                      | 2.32                                       | 6.95                                  | 7.36                                   | 1.31                                       | 1.29                                        | 1.26                                                                              | 1.28                                                                               | 3.84                                                                          | 4.07                                                                           |                                  |   |
| 4  | Player 3            | 1.80            | 2.11                                      | 2.13                                       | 6.88                                  | 6.85                                   | 1.34                                       | 1.32                                        | 1.17                                                                              | 1.18                                                                               | 3.82                                                                          | 3.81                                                                           |                                  |   |
| 5  | Player 4            | 1.91            | 2.01                                      | 2.06                                       | 6.49                                  | 7.05                                   | 1.35                                       | 1.39                                        | 1.05                                                                              | 1.08                                                                               | 3.40                                                                          | 3.69                                                                           |                                  |   |
| 6  | Player 5            | 1.84            | 1.99                                      | 1.95                                       | 6.63                                  | 6.51                                   | 1.44                                       | 1.43                                        | 1.08                                                                              | 1.06                                                                               | 3.60                                                                          | 3.54                                                                           |                                  |   |
| 7  | Player 6            | 1.82            | 2.11                                      | 2.10                                       | 6.69                                  | 6.65                                   | 1.40                                       | 1.46                                        | 1.16                                                                              | 1.15                                                                               | 3.68                                                                          | 3.65                                                                           |                                  |   |
| 8  | Player 7            | 1.85            | 2.04                                      | 1.83                                       | 6.82                                  | 6.16                                   | 1.48                                       | 1.61                                        | 1.10                                                                              | 0.99                                                                               | 3.69                                                                          | 3.33                                                                           |                                  |   |
| 9  | Player 8            | 1.80            | 2.10                                      | 2.13                                       | 6.88                                  | 7.02                                   | 1.45                                       | 1.36                                        | 1.17                                                                              | 1.18                                                                               | 3.82                                                                          | 3.90                                                                           |                                  |   |
| 10 | Player 9            | 1.83            | 2.14                                      | 2.01                                       | 6.77                                  | 7.08                                   | 1.34                                       | 1.36                                        | 1.17                                                                              | 1.10                                                                               | 3.70                                                                          | 3.87                                                                           |                                  |   |
| 11 | Player 10           | 1.88            | 2.12                                      | 2.20                                       | 6.97                                  | 7.10                                   | 1.34                                       | 1.32                                        | 1.13                                                                              | 1.17                                                                               | 3.71                                                                          | 3.78                                                                           |                                  |   |
| 12 |                     |                 |                                           |                                            |                                       |                                        |                                            |                                             |                                                                                   |                                                                                    |                                                                               |                                                                                |                                  |   |

Figure S4 The calculation of Limb Symmetry Index, LSI for single-hop test distance.

|    | A                   | D                                          | E                                     | F                                      | G                                          | H                                           | I                                                                                 | J                                                                                  | K                                                                             | L                                                                              | M                                | N                            | O                                 | P |
|----|---------------------|--------------------------------------------|---------------------------------------|----------------------------------------|--------------------------------------------|---------------------------------------------|-----------------------------------------------------------------------------------|------------------------------------------------------------------------------------|-------------------------------------------------------------------------------|--------------------------------------------------------------------------------|----------------------------------|------------------------------|-----------------------------------|---|
|    | Consecutive players | Single-leg hop test distance right leg [m] | Triple hop test distance left leg [m] | Triple hop test distance right leg [m] | Six-meter timed hop test time left leg [s] | Six-meter timed hop test time right leg [s] | Normalized single-leg hop test distance left leg [ $\text{m}\cdot\text{m}^{-1}$ ] | Normalized single-leg hop test distance right leg [ $\text{m}\cdot\text{m}^{-1}$ ] | Normalized triple hop test distance left leg [ $\text{m}\cdot\text{m}^{-1}$ ] | Normalized triple hop test distance right leg [ $\text{m}\cdot\text{m}^{-1}$ ] | Single-leg hop test distance LSI | Triple hop test distance LSI | Six-meter timed hop test time LSI |   |
| 1  |                     |                                            |                                       |                                        |                                            |                                             |                                                                                   |                                                                                    |                                                                               |                                                                                |                                  |                              |                                   |   |
| 2  | Player 1            | 2.30                                       | 7.65                                  | 7.98                                   | 1.34                                       | 1.28                                        | 1.27                                                                              | 1.26                                                                               | 4.18                                                                          | 4.36                                                                           | 98.71                            | 95.86                        | 95.75                             |   |
| 3  | Player 2            | 2.32                                       | 6.95                                  | 7.36                                   | 1.31                                       | 1.29                                        | 1.26                                                                              | 1.28                                                                               | 3.84                                                                          | 4.07                                                                           | 98.28                            | 94.43                        | 98.32                             |   |
| 4  | Player 3            | 2.13                                       | 6.88                                  | 6.85                                   | 1.34                                       | 1.32                                        | 1.17                                                                              | 1.18                                                                               | 3.82                                                                          | 3.81                                                                           | 99.06                            | 99.56                        | 98.14                             |   |
| 5  | Player 4            | 2.06                                       | 6.49                                  | 7.05                                   | 1.35                                       | 1.39                                        | 1.05                                                                              | 1.08                                                                               | 3.40                                                                          | 3.69                                                                           | 97.57                            | 92.06                        | 97.48                             |   |
| 6  | Player 5            | 1.95                                       | 6.63                                  | 6.51                                   | 1.44                                       | 1.43                                        | 1.08                                                                              | 1.06                                                                               | 3.60                                                                          | 3.54                                                                           | 97.99                            | 98.19                        | 98.89                             |   |
| 7  | Player 6            | 2.10                                       | 6.69                                  | 6.65                                   | 1.40                                       | 1.46                                        | 1.16                                                                              | 1.15                                                                               | 3.68                                                                          | 3.65                                                                           | 99.53                            | 99.40                        | 96.29                             |   |
| 8  | Player 7            | 1.83                                       | 6.82                                  | 6.16                                   | 1.48                                       | 1.61                                        | 1.10                                                                              | 0.99                                                                               | 3.69                                                                          | 3.33                                                                           | 89.71                            | 90.32                        | 91.51                             |   |
| 9  | Player 8            | 2.13                                       | 6.88                                  | 7.02                                   | 1.45                                       | 1.36                                        | 1.17                                                                              | 1.18                                                                               | 3.82                                                                          | 3.90                                                                           | 98.59                            | 98.01                        | 93.80                             |   |
| 10 | Player 9            | 2.01                                       | 6.77                                  | 7.08                                   | 1.34                                       | 1.36                                        | 1.17                                                                              | 1.10                                                                               | 3.70                                                                          | 3.87                                                                           | 93.93                            | 95.62                        | 98.39                             |   |
| 11 | Player 10           | 2.20                                       | 6.97                                  | 7.10                                   | 1.34                                       | 1.32                                        | 1.13                                                                              | 1.17                                                                               | 3.71                                                                          | 3.78                                                                           | 96.36                            | 98.17                        | 98.14                             |   |
| 12 |                     |                                            |                                       |                                        |                                            |                                             |                                                                                   |                                                                                    |                                                                               |                                                                                |                                  |                              |                                   |   |

Figure S5 Calculated Limb Symmetry Index, LSI for single-leg hop test distance, triple hop test distance and six-meter timed hop test time.

4. Using the formula presented in Figure S6, calculate the arithmetic mean of six-meter timed hop test time separately for left and right legs (s), normalized single-leg hop test distance separately for left and right legs ( $\text{m}\cdot\text{m}^{-1}$ ), normalized triple hop test distance separately for left and right legs ( $\text{m}\cdot\text{m}^{-1}$ ), single-leg hop test distance LSI, triple hop test distance LSI, six-meter timed hop test time LSI in a given team as presented in Figure S7.

|     |                     |                                        |                                            |                                             |                                                                       |                                                                        |                                                                   |                                                                    |                                  |                              |                                   |                  |  |  |  |  |  |  |  |  |  |  |  |
|-----|---------------------|----------------------------------------|--------------------------------------------|---------------------------------------------|-----------------------------------------------------------------------|------------------------------------------------------------------------|-------------------------------------------------------------------|--------------------------------------------------------------------|----------------------------------|------------------------------|-----------------------------------|------------------|--|--|--|--|--|--|--|--|--|--|--|
| G12 |                     |                                        |                                            |                                             |                                                                       |                                                                        |                                                                   |                                                                    |                                  |                              |                                   | =AVERAGE(G2:G11) |  |  |  |  |  |  |  |  |  |  |  |
|     | A                   | F                                      | G                                          | H                                           | I                                                                     | J                                                                      | K                                                                 | L                                                                  | M                                | N                            | O                                 | P                |  |  |  |  |  |  |  |  |  |  |  |
|     | Consecutive players | Triple hop test distance right leg [m] | Six-meter timed hop test time left leg [s] | Six-meter timed hop test time right leg [s] | Normalized single-leg hop test distance left leg [m·m <sup>-1</sup> ] | Normalized single-leg hop test distance right leg [m·m <sup>-1</sup> ] | Normalized triple hop test distance left leg [m·m <sup>-1</sup> ] | Normalized triple hop test distance right leg [m·m <sup>-1</sup> ] | Single-leg hop test distance LSI | Triple hop test distance LSI | Six-meter timed hop test time LSI |                  |  |  |  |  |  |  |  |  |  |  |  |
| 1   |                     |                                        |                                            |                                             |                                                                       |                                                                        |                                                                   |                                                                    |                                  |                              |                                   |                  |  |  |  |  |  |  |  |  |  |  |  |
| 2   | Player 1            | 7.98                                   | 1.34                                       | 1.28                                        | 1.27                                                                  | 1.26                                                                   | 4.18                                                              | 4.36                                                               | 98.71                            | 95.86                        | 95.75                             |                  |  |  |  |  |  |  |  |  |  |  |  |
| 3   | Player 2            | 7.36                                   | 1.31                                       | 1.29                                        | 1.26                                                                  | 1.28                                                                   | 3.84                                                              | 4.07                                                               | 98.28                            | 94.43                        | 98.32                             |                  |  |  |  |  |  |  |  |  |  |  |  |
| 4   | Player 3            | 6.85                                   | 1.34                                       | 1.32                                        | 1.17                                                                  | 1.18                                                                   | 3.82                                                              | 3.81                                                               | 99.06                            | 99.56                        | 98.14                             |                  |  |  |  |  |  |  |  |  |  |  |  |
| 5   | Player 4            | 7.05                                   | 1.35                                       | 1.39                                        | 1.05                                                                  | 1.08                                                                   | 3.40                                                              | 3.69                                                               | 97.57                            | 92.06                        | 97.48                             |                  |  |  |  |  |  |  |  |  |  |  |  |
| 6   | Player 5            | 6.51                                   | 1.44                                       | 1.43                                        | 1.08                                                                  | 1.06                                                                   | 3.60                                                              | 3.54                                                               | 97.99                            | 98.19                        | 98.89                             |                  |  |  |  |  |  |  |  |  |  |  |  |
| 7   | Player 6            | 6.65                                   | 1.40                                       | 1.46                                        | 1.16                                                                  | 1.15                                                                   | 3.68                                                              | 3.65                                                               | 99.53                            | 99.40                        | 96.29                             |                  |  |  |  |  |  |  |  |  |  |  |  |
| 8   | Player 7            | 6.16                                   | 1.48                                       | 1.61                                        | 1.10                                                                  | 0.99                                                                   | 3.69                                                              | 3.33                                                               | 89.71                            | 90.32                        | 91.51                             |                  |  |  |  |  |  |  |  |  |  |  |  |
| 9   | Player 8            | 7.02                                   | 1.45                                       | 1.36                                        | 1.17                                                                  | 1.18                                                                   | 3.82                                                              | 3.90                                                               | 98.59                            | 98.01                        | 93.80                             |                  |  |  |  |  |  |  |  |  |  |  |  |
| 10  | Player 9            | 7.08                                   | 1.34                                       | 1.36                                        | 1.17                                                                  | 1.10                                                                   | 3.70                                                              | 3.87                                                               | 93.93                            | 95.62                        | 98.39                             |                  |  |  |  |  |  |  |  |  |  |  |  |
| 11  | Player 10           | 7.10                                   | 1.34                                       | 1.32                                        | 1.13                                                                  | 1.17                                                                   | 3.71                                                              | 3.78                                                               | 96.36                            | 98.17                        | 98.14                             |                  |  |  |  |  |  |  |  |  |  |  |  |
| 12  |                     | MEAN                                   | =AVERAGE(G2:G11)                           |                                             |                                                                       |                                                                        |                                                                   |                                                                    |                                  |                              |                                   |                  |  |  |  |  |  |  |  |  |  |  |  |
| 13  |                     |                                        |                                            |                                             |                                                                       |                                                                        |                                                                   |                                                                    |                                  |                              |                                   |                  |  |  |  |  |  |  |  |  |  |  |  |

Figure S6 The formula for calculating the arithmetic mean in a given team for the left leg's six-meter timed hop test time.

|     |                     |                                        |                                            |                                             |                                                                       |                                                                        |                                                                   |                                                                    |                                  |                              |                                   |   |
|-----|---------------------|----------------------------------------|--------------------------------------------|---------------------------------------------|-----------------------------------------------------------------------|------------------------------------------------------------------------|-------------------------------------------------------------------|--------------------------------------------------------------------|----------------------------------|------------------------------|-----------------------------------|---|
| A14 |                     |                                        |                                            |                                             |                                                                       |                                                                        |                                                                   |                                                                    |                                  |                              |                                   |   |
|     | A                   | F                                      | G                                          | H                                           | I                                                                     | J                                                                      | K                                                                 | L                                                                  | M                                | N                            | O                                 | P |
|     | Consecutive players | Triple hop test distance right leg [m] | Six-meter timed hop test time left leg [s] | Six-meter timed hop test time right leg [s] | Normalized single-leg hop test distance left leg [m·m <sup>-1</sup> ] | Normalized single-leg hop test distance right leg [m·m <sup>-1</sup> ] | Normalized triple hop test distance left leg [m·m <sup>-1</sup> ] | Normalized triple hop test distance right leg [m·m <sup>-1</sup> ] | Single-leg hop test distance LSI | Triple hop test distance LSI | Six-meter timed hop test time LSI |   |
| 1   |                     |                                        |                                            |                                             |                                                                       |                                                                        |                                                                   |                                                                    |                                  |                              |                                   |   |
| 2   | Player 1            | 7.98                                   | 1.34                                       | 1.28                                        | 1.27                                                                  | 1.26                                                                   | 4.18                                                              | 4.36                                                               | 98.71                            | 95.86                        | 95.75                             |   |
| 3   | Player 2            | 7.36                                   | 1.31                                       | 1.29                                        | 1.26                                                                  | 1.28                                                                   | 3.84                                                              | 4.07                                                               | 98.28                            | 94.43                        | 98.32                             |   |
| 4   | Player 3            | 6.85                                   | 1.34                                       | 1.32                                        | 1.17                                                                  | 1.18                                                                   | 3.82                                                              | 3.81                                                               | 99.06                            | 99.56                        | 98.14                             |   |
| 5   | Player 4            | 7.05                                   | 1.35                                       | 1.39                                        | 1.05                                                                  | 1.08                                                                   | 3.40                                                              | 3.69                                                               | 97.57                            | 92.06                        | 97.48                             |   |
| 6   | Player 5            | 6.51                                   | 1.44                                       | 1.43                                        | 1.08                                                                  | 1.06                                                                   | 3.60                                                              | 3.54                                                               | 97.99                            | 98.19                        | 98.89                             |   |
| 7   | Player 6            | 6.65                                   | 1.40                                       | 1.46                                        | 1.16                                                                  | 1.15                                                                   | 3.68                                                              | 3.65                                                               | 99.53                            | 99.40                        | 96.29                             |   |
| 8   | Player 7            | 6.16                                   | 1.48                                       | 1.61                                        | 1.10                                                                  | 0.99                                                                   | 3.69                                                              | 3.33                                                               | 89.71                            | 90.32                        | 91.51                             |   |
| 9   | Player 8            | 7.02                                   | 1.45                                       | 1.36                                        | 1.17                                                                  | 1.18                                                                   | 3.82                                                              | 3.90                                                               | 98.59                            | 98.01                        | 93.80                             |   |
| 10  | Player 9            | 7.08                                   | 1.34                                       | 1.36                                        | 1.17                                                                  | 1.10                                                                   | 3.70                                                              | 3.87                                                               | 93.93                            | 95.62                        | 98.39                             |   |
| 11  | Player 10           | 7.10                                   | 1.34                                       | 1.32                                        | 1.13                                                                  | 1.17                                                                   | 3.71                                                              | 3.78                                                               | 96.36                            | 98.17                        | 98.14                             |   |
| 12  |                     | MEAN                                   | 1.38                                       | 1.38                                        | 1.16                                                                  | 1.15                                                                   | 3.74                                                              | 3.80                                                               | 96.97                            | 96.16                        | 96.67                             |   |
| 13  |                     |                                        |                                            |                                             |                                                                       |                                                                        |                                                                   |                                                                    |                                  |                              |                                   |   |

Figure S7 The calculated arithmetic mean of six-meter timed hop test time separately for left and right legs (s), normalized single-leg hop test distance separately for left and right legs (m\*m<sup>-1</sup>), normalized triple hop test distance separately for left and right legs (m\*m<sup>-1</sup>), single-leg hop test distance Limb Symmetry Index, LSI, triple hop test distance LSI, and six-meter timed hop test time LSI in a given team.

- Using the formula presented in Figure S8, calculate the standard deviation of athletes of six-meter timed hop test time separately for left and right legs (s), normalized single-leg hop test distance separately for left and right legs (m\*m<sup>-1</sup>), normalized triple hop test distance separately for left and right legs (m\*m<sup>-1</sup>), single-leg hop test distance LSI, triple hop test distance LSI, six-meter timed hop test time LSI in a given team as presented in Figure S9.

|    |                        |                                              |                                                  |                                                   |                                                                                |                                                                                 |                                                                            |                                                                             |                                        |                                    |                                            |   |  |
|----|------------------------|----------------------------------------------|--------------------------------------------------|---------------------------------------------------|--------------------------------------------------------------------------------|---------------------------------------------------------------------------------|----------------------------------------------------------------------------|-----------------------------------------------------------------------------|----------------------------------------|------------------------------------|--------------------------------------------|---|--|
| G2 |                        |                                              |                                                  |                                                   |                                                                                |                                                                                 |                                                                            |                                                                             |                                        |                                    |                                            |   |  |
|    |                        |                                              |                                                  |                                                   |                                                                                |                                                                                 |                                                                            |                                                                             |                                        |                                    |                                            |   |  |
|    | A                      | F                                            | G                                                | H                                                 | I                                                                              | J                                                                               | K                                                                          | L                                                                           | M                                      | N                                  | O                                          | P |  |
|    | Consecutive<br>players | Triple hop test<br>distance right<br>leg [m] | Six-meter timed<br>hop test time<br>left leg [s] | Six-meter timed<br>hop test time<br>right leg [s] | Normalized<br>single-leg hop<br>test distance left<br>leg [m*m <sup>-1</sup> ] | Normalized<br>single-leg hop<br>test distance<br>right leg [m*m <sup>-1</sup> ] | Normalized<br>triple hop test<br>distance left leg<br>[m*m <sup>-1</sup> ] | Normalized<br>triple hop test<br>distance right<br>leg [m*m <sup>-1</sup> ] | Single-leg<br>hop test<br>distance LSI | Triple hop<br>test distance<br>LSI | Six-meter<br>timed hop<br>test time<br>LSI |   |  |
| 1  |                        |                                              |                                                  |                                                   |                                                                                |                                                                                 |                                                                            |                                                                             |                                        |                                    |                                            |   |  |
| 2  | Player 1               | 7.98                                         | 1.34                                             | 1.28                                              | 1.27                                                                           | 1.26                                                                            | 4.18                                                                       | 4.36                                                                        | 98.71                                  | 95.86                              | 95.75                                      |   |  |
| 3  | Player 2               | 7.36                                         | 1.31                                             | 1.29                                              | 1.26                                                                           | 1.28                                                                            | 3.84                                                                       | 4.07                                                                        | 98.28                                  | 94.43                              | 98.32                                      |   |  |
| 4  | Player 3               | 6.85                                         | 1.34                                             | 1.32                                              | 1.17                                                                           | 1.18                                                                            | 3.82                                                                       | 3.81                                                                        | 99.06                                  | 99.56                              | 98.14                                      |   |  |
| 5  | Player 4               | 7.05                                         | 1.35                                             | 1.39                                              | 1.05                                                                           | 1.08                                                                            | 3.40                                                                       | 3.69                                                                        | 97.57                                  | 92.06                              | 97.48                                      |   |  |
| 6  | Player 5               | 6.51                                         | 1.44                                             | 1.43                                              | 1.08                                                                           | 1.06                                                                            | 3.60                                                                       | 3.54                                                                        | 97.99                                  | 98.19                              | 98.89                                      |   |  |
| 7  | Player 6               | 6.65                                         | 1.40                                             | 1.46                                              | 1.16                                                                           | 1.15                                                                            | 3.68                                                                       | 3.65                                                                        | 99.53                                  | 99.40                              | 96.29                                      |   |  |
| 8  | Player 7               | 6.16                                         | 1.48                                             | 1.61                                              | 1.10                                                                           | 0.99                                                                            | 3.69                                                                       | 3.33                                                                        | 89.71                                  | 90.32                              | 91.51                                      |   |  |
| 9  | Player 8               | 7.02                                         | 1.45                                             | 1.36                                              | 1.17                                                                           | 1.18                                                                            | 3.82                                                                       | 3.90                                                                        | 98.59                                  | 98.01                              | 93.80                                      |   |  |
| 10 | Player 9               | 7.08                                         | 1.34                                             | 1.36                                              | 1.17                                                                           | 1.10                                                                            | 3.70                                                                       | 3.87                                                                        | 93.93                                  | 95.62                              | 98.39                                      |   |  |
| 11 | Player 10              | 7.10                                         | 1.34                                             | 1.32                                              | 1.13                                                                           | 1.17                                                                            | 3.71                                                                       | 3.78                                                                        | 96.36                                  | 98.17                              | 98.14                                      |   |  |
| 12 |                        | MEAN                                         | 1.38                                             | 1.38                                              | 1.16                                                                           | 1.15                                                                            | 3.74                                                                       | 3.80                                                                        | 96.97                                  | 96.16                              | 96.67                                      |   |  |
| 13 |                        | =STDEV(G2:G11)                               |                                                  |                                                   |                                                                                |                                                                                 |                                                                            |                                                                             |                                        |                                    |                                            |   |  |
| 14 |                        |                                              |                                                  |                                                   |                                                                                |                                                                                 |                                                                            |                                                                             |                                        |                                    |                                            |   |  |

Figure S8 The formula for calculating the standard deviation for a given team's left leg's six-meter timed hop test time.

|     |                     |                                        |                                            |                                             |                                                                       |                                                                        |                                                                   |                                                                    |                                  |                              |                                   |   |
|-----|---------------------|----------------------------------------|--------------------------------------------|---------------------------------------------|-----------------------------------------------------------------------|------------------------------------------------------------------------|-------------------------------------------------------------------|--------------------------------------------------------------------|----------------------------------|------------------------------|-----------------------------------|---|
| Q16 |                     |                                        |                                            |                                             |                                                                       |                                                                        |                                                                   |                                                                    |                                  |                              |                                   |   |
|     | A                   | F                                      | G                                          | H                                           | I                                                                     | J                                                                      | K                                                                 | L                                                                  | M                                | N                            | O                                 | P |
|     | Consecutive players | Triple hop test distance right leg [m] | Six-meter timed hop test time left leg [s] | Six-meter timed hop test time right leg [s] | Normalized single-leg hop test distance left leg [m·m <sup>-1</sup> ] | Normalized single-leg hop test distance right leg [m·m <sup>-1</sup> ] | Normalized triple hop test distance left leg [m·m <sup>-1</sup> ] | Normalized triple hop test distance right leg [m·m <sup>-1</sup> ] | Single-leg hop test distance LSI | Triple hop test distance LSI | Six-meter timed hop test time LSI |   |
| 1   |                     |                                        |                                            |                                             |                                                                       |                                                                        |                                                                   |                                                                    |                                  |                              |                                   |   |
| 2   | Player 1            | 7.98                                   | 1.34                                       | 1.28                                        | 1.27                                                                  | 1.26                                                                   | 4.18                                                              | 4.36                                                               | 98.71                            | 95.86                        | 95.75                             |   |
| 3   | Player 2            | 7.36                                   | 1.31                                       | 1.29                                        | 1.26                                                                  | 1.28                                                                   | 3.84                                                              | 4.07                                                               | 98.28                            | 94.43                        | 98.32                             |   |
| 4   | Player 3            | 6.85                                   | 1.34                                       | 1.32                                        | 1.17                                                                  | 1.18                                                                   | 3.82                                                              | 3.81                                                               | 99.06                            | 99.56                        | 98.14                             |   |
| 5   | Player 4            | 7.05                                   | 1.35                                       | 1.39                                        | 1.05                                                                  | 1.08                                                                   | 3.40                                                              | 3.69                                                               | 97.57                            | 92.06                        | 97.48                             |   |
| 6   | Player 5            | 6.51                                   | 1.44                                       | 1.43                                        | 1.08                                                                  | 1.06                                                                   | 3.60                                                              | 3.54                                                               | 97.99                            | 98.19                        | 98.89                             |   |
| 7   | Player 6            | 6.65                                   | 1.40                                       | 1.46                                        | 1.16                                                                  | 1.15                                                                   | 3.68                                                              | 3.65                                                               | 99.53                            | 99.40                        | 96.29                             |   |
| 8   | Player 7            | 6.16                                   | 1.48                                       | 1.61                                        | 1.10                                                                  | 0.99                                                                   | 3.69                                                              | 3.33                                                               | 89.71                            | 90.32                        | 91.51                             |   |
| 9   | Player 8            | 7.02                                   | 1.45                                       | 1.36                                        | 1.17                                                                  | 1.18                                                                   | 3.82                                                              | 3.90                                                               | 98.59                            | 98.01                        | 93.80                             |   |
| 10  | Player 9            | 7.08                                   | 1.34                                       | 1.36                                        | 1.17                                                                  | 1.10                                                                   | 3.70                                                              | 3.87                                                               | 93.93                            | 95.62                        | 98.39                             |   |
| 11  | Player 10           | 7.10                                   | 1.34                                       | 1.32                                        | 1.13                                                                  | 1.17                                                                   | 3.71                                                              | 3.78                                                               | 96.36                            | 98.17                        | 98.14                             |   |
| 12  |                     | MEAN                                   | 1.38                                       | 1.38                                        | 1.16                                                                  | 1.15                                                                   | 3.74                                                              | 3.80                                                               | 96.97                            | 96.16                        | 96.67                             |   |
| 13  |                     | STDEV                                  | 0.06                                       | 0.10                                        | 0.07                                                                  | 0.09                                                                   | 0.20                                                              | 0.28                                                               | 3.02                             | 3.13                         | 2.39                              |   |
| 14  |                     |                                        |                                            |                                             |                                                                       |                                                                        |                                                                   |                                                                    |                                  |                              |                                   |   |

Figure S9 The calculated standard deviation of six-meter timed hop test time separately for left and right legs (s), normalized single-leg hop test distance separately for left and right legs (m\*m<sup>-1</sup>), normalized triple hop test distance separately for left and right legs (m\*m<sup>-1</sup>), single-leg hop test distance Limb Symmetry Index, LSI, triple hop test distance LSI, and six-meter timed hop test time LSI in a given team.

- Using the formulas presented in Figure S10 and Figure S11, calculate each athlete's z-score for studied variables. The formula for calculating a z-score is  $z = (x - \mu) / \sigma$ , where  $x$  is the score of the particular athlete,  $\mu$  is the mean in a given team, and  $\sigma$  is the standard deviation in a given team. In the six-meter timed hop test time, conversely to the remaining tests, a higher value indicates worse performance; the z-score has to be multiplied by negative 1 (Figure S10). The z-scores have to be calculated for the six-meter timed hop test time separately for left and right legs, normalized single-leg hop test distance separately for left and right legs, normalized triple hop test distance separately for left and right legs, single-leg hop test distance LSI, triple hop test distance LSI, and six-meter timed hop test time LSI as presented in Figure S12.

|    |                            |                                        |                                            |                                             |                                                                       |                                                                        |                                                                   |                                                                    |                                  |                              |                                   |                                                |                                                 |
|----|----------------------------|----------------------------------------|--------------------------------------------|---------------------------------------------|-----------------------------------------------------------------------|------------------------------------------------------------------------|-------------------------------------------------------------------|--------------------------------------------------------------------|----------------------------------|------------------------------|-----------------------------------|------------------------------------------------|-------------------------------------------------|
| P2 | =((G2-\$G\$12)/\$G\$13)*-1 |                                        |                                            |                                             |                                                                       |                                                                        |                                                                   |                                                                    |                                  |                              |                                   |                                                |                                                 |
|    | A                          | F                                      | G                                          | H                                           | I                                                                     | J                                                                      | K                                                                 | L                                                                  | M                                | N                            | O                                 | P                                              | Q                                               |
|    | Consecutive players        | Triple hop test distance right leg [m] | Six-meter timed hop test time left leg [s] | Six-meter timed hop test time right leg [s] | Normalized single-leg hop test distance left leg [m·m <sup>-1</sup> ] | Normalized single-leg hop test distance right leg [m·m <sup>-1</sup> ] | Normalized triple hop test distance left leg [m·m <sup>-1</sup> ] | Normalized triple hop test distance right leg [m·m <sup>-1</sup> ] | Single-leg hop test distance LSI | Triple hop test distance LSI | Six-meter timed hop test time LSI | Six-meter timed hop test time left leg z-score | Six-meter timed hop test time right leg z-score |
| 1  |                            |                                        |                                            |                                             |                                                                       |                                                                        |                                                                   |                                                                    |                                  |                              |                                   |                                                |                                                 |
| 2  | Player 1                   | 7.98                                   | 1.34                                       | 1.28                                        | 1.27                                                                  | 1.26                                                                   | 4.18                                                              | 4.36                                                               | 98.71                            | 95.86                        | 95.75                             | =((G2-\$G\$12)/\$G\$13)*-                      |                                                 |
| 3  | Player 2                   | 7.36                                   | 1.31                                       | 1.29                                        | 1.26                                                                  | 1.28                                                                   | 3.84                                                              | 4.07                                                               | 98.28                            | 94.43                        | 98.32                             |                                                |                                                 |
| 4  | Player 3                   | 6.85                                   | 1.34                                       | 1.32                                        | 1.17                                                                  | 1.18                                                                   | 3.82                                                              | 3.81                                                               | 99.06                            | 99.56                        | 98.14                             |                                                |                                                 |
| 5  | Player 4                   | 7.05                                   | 1.35                                       | 1.39                                        | 1.05                                                                  | 1.08                                                                   | 3.40                                                              | 3.69                                                               | 97.57                            | 92.06                        | 97.48                             |                                                |                                                 |
| 6  | Player 5                   | 6.51                                   | 1.44                                       | 1.43                                        | 1.08                                                                  | 1.06                                                                   | 3.60                                                              | 3.54                                                               | 97.99                            | 98.19                        | 98.89                             |                                                |                                                 |
| 7  | Player 6                   | 6.65                                   | 1.40                                       | 1.46                                        | 1.16                                                                  | 1.15                                                                   | 3.68                                                              | 3.65                                                               | 99.53                            | 99.40                        | 96.29                             |                                                |                                                 |
| 8  | Player 7                   | 6.16                                   | 1.48                                       | 1.61                                        | 1.10                                                                  | 0.99                                                                   | 3.69                                                              | 3.33                                                               | 89.71                            | 90.32                        | 91.51                             |                                                |                                                 |
| 9  | Player 8                   | 7.02                                   | 1.45                                       | 1.36                                        | 1.17                                                                  | 1.18                                                                   | 3.82                                                              | 3.90                                                               | 98.59                            | 98.01                        | 93.80                             |                                                |                                                 |
| 10 | Player 9                   | 7.08                                   | 1.34                                       | 1.36                                        | 1.17                                                                  | 1.10                                                                   | 3.70                                                              | 3.87                                                               | 93.93                            | 95.62                        | 98.39                             |                                                |                                                 |
| 11 | Player 10                  | 7.10                                   | 1.34                                       | 1.32                                        | 1.13                                                                  | 1.17                                                                   | 3.71                                                              | 3.78                                                               | 96.36                            | 98.17                        | 98.14                             |                                                |                                                 |
| 12 |                            | MEAN                                   | 1.38                                       | 1.38                                        | 1.16                                                                  | 1.15                                                                   | 3.74                                                              | 3.80                                                               | 96.97                            | 96.16                        | 96.67                             |                                                |                                                 |
| 13 |                            | STDEV                                  | 0.06                                       | 0.10                                        | 0.07                                                                  | 0.09                                                                   | 0.20                                                              | 0.28                                                               | 3.02                             | 3.13                         | 2.39                              |                                                |                                                 |

Figure S10 The formula for calculating the z-score for a left leg's six-meter timed hop test time.

|    |                     |                                             |                                                                       |                                                                        |                                                                   |                                                                    |                                  |                              |                                   |                                                |                                                 |                                                          |                                                           |                       |  |
|----|---------------------|---------------------------------------------|-----------------------------------------------------------------------|------------------------------------------------------------------------|-------------------------------------------------------------------|--------------------------------------------------------------------|----------------------------------|------------------------------|-----------------------------------|------------------------------------------------|-------------------------------------------------|----------------------------------------------------------|-----------------------------------------------------------|-----------------------|--|
| R2 |                     |                                             |                                                                       |                                                                        |                                                                   |                                                                    |                                  |                              |                                   |                                                |                                                 |                                                          |                                                           | =(I2-\$I\$12)/\$I\$13 |  |
|    | A                   | H                                           | I                                                                     | J                                                                      | K                                                                 | L                                                                  | M                                | N                            | O                                 | P                                              | Q                                               | R                                                        | S                                                         |                       |  |
|    | Consecutive players | Six-meter timed hop test time right leg [s] | Normalized single-leg hop test distance left leg [m·m <sup>-1</sup> ] | Normalized single-leg hop test distance right leg [m·m <sup>-1</sup> ] | Normalized triple hop test distance left leg [m·m <sup>-1</sup> ] | Normalized triple hop test distance right leg [m·m <sup>-1</sup> ] | Single-leg hop test distance LSI | Triple hop test distance LSI | Six-meter timed hop test time LSI | Six-meter timed hop test time left leg z-score | Six-meter timed hop test time right leg z-score | Normalized single-leg hop test distance left leg z-score | Normalized single-leg hop test distance right leg z-score |                       |  |
| 1  |                     |                                             |                                                                       |                                                                        |                                                                   |                                                                    |                                  |                              |                                   |                                                |                                                 |                                                          |                                                           |                       |  |
| 2  | Player 1            | 1.28                                        | 1.27                                                                  | 1.26                                                                   | 4.18                                                              | 4.36                                                               | 98.71                            | 95.86                        | 95.75                             | 0.69                                           |                                                 | =(I2-\$I\$12)/\$I\$13                                    |                                                           |                       |  |
| 3  | Player 2            | 1.29                                        | 1.26                                                                  | 1.28                                                                   | 3.84                                                              | 4.07                                                               | 98.28                            | 94.43                        | 98.32                             | 1.18                                           |                                                 |                                                          |                                                           |                       |  |
| 4  | Player 3            | 1.32                                        | 1.17                                                                  | 1.18                                                                   | 3.82                                                              | 3.81                                                               | 99.06                            | 99.56                        | 98.14                             | 0.68                                           |                                                 |                                                          |                                                           |                       |  |
| 5  | Player 4            | 1.39                                        | 1.05                                                                  | 1.08                                                                   | 3.40                                                              | 3.69                                                               | 97.57                            | 92.06                        | 97.48                             | 0.47                                           |                                                 |                                                          |                                                           |                       |  |
| 6  | Player 5            | 1.43                                        | 1.08                                                                  | 1.06                                                                   | 3.60                                                              | 3.54                                                               | 97.99                            | 98.19                        | 98.89                             | -1.06                                          |                                                 |                                                          |                                                           |                       |  |
| 7  | Player 6            | 1.46                                        | 1.16                                                                  | 1.15                                                                   | 3.68                                                              | 3.65                                                               | 99.53                            | 99.40                        | 96.29                             | -0.36                                          |                                                 |                                                          |                                                           |                       |  |
| 8  | Player 7            | 1.61                                        | 1.10                                                                  | 0.99                                                                   | 3.69                                                              | 3.33                                                               | 89.71                            | 90.32                        | 91.51                             | -1.66                                          |                                                 |                                                          |                                                           |                       |  |
| 9  | Player 8            | 1.36                                        | 1.17                                                                  | 1.18                                                                   | 3.82                                                              | 3.90                                                               | 98.59                            | 98.01                        | 93.80                             | -1.25                                          |                                                 |                                                          |                                                           |                       |  |
| 10 | Player 9            | 1.36                                        | 1.17                                                                  | 1.10                                                                   | 3.70                                                              | 3.87                                                               | 93.93                            | 95.62                        | 98.39                             | 0.68                                           |                                                 |                                                          |                                                           |                       |  |
| 11 | Player 10           | 1.32                                        | 1.13                                                                  | 1.17                                                                   | 3.71                                                              | 3.78                                                               | 96.36                            | 98.17                        | 98.14                             | 0.64                                           |                                                 |                                                          |                                                           |                       |  |
| 12 |                     | 1.38                                        | 1.16                                                                  | 1.15                                                                   | 3.74                                                              | 3.80                                                               | 96.97                            | 96.16                        | 96.67                             |                                                |                                                 |                                                          |                                                           |                       |  |
| 13 |                     | 0.10                                        | 0.07                                                                  | 0.09                                                                   | 0.20                                                              | 0.28                                                               | 3.02                             | 3.13                         | 2.39                              |                                                |                                                 |                                                          |                                                           |                       |  |

Figure S11 The formula for calculating the z-score for a left leg's normalized single-leg hop test distance.

| A14 |                     |                                        |                                            |                                             |                                                                       |                                                                        |                                                                   |                                                                    |                                  |                              |                                   |                                                |                                                 |                                                          |                                                           |                                                      |                                                       |                                          | =AVERAGE(P2:X2)                      |                                           |
|-----|---------------------|----------------------------------------|--------------------------------------------|---------------------------------------------|-----------------------------------------------------------------------|------------------------------------------------------------------------|-------------------------------------------------------------------|--------------------------------------------------------------------|----------------------------------|------------------------------|-----------------------------------|------------------------------------------------|-------------------------------------------------|----------------------------------------------------------|-----------------------------------------------------------|------------------------------------------------------|-------------------------------------------------------|------------------------------------------|--------------------------------------|-------------------------------------------|
|     | A                   | F                                      | G                                          | H                                           | I                                                                     | J                                                                      | K                                                                 | L                                                                  | M                                | N                            | O                                 | P                                              | Q                                               | R                                                        | S                                                         | T                                                    | U                                                     | V                                        | W                                    | X                                         |
| 1   | Consecutive players | Triple hop test distance right leg [s] | Six-meter timed hop test time left leg [s] | Six-meter timed hop test time right leg [s] | Normalized single-leg hop test distance left leg [m·m <sup>-1</sup> ] | Normalized single-leg hop test distance right leg [m·m <sup>-1</sup> ] | Normalized triple hop test distance left leg [m·m <sup>-1</sup> ] | Normalized triple hop test distance right leg [m·m <sup>-1</sup> ] | Single-leg hop test distance LSI | Triple hop test distance LSI | Six-meter timed hop test time LSI | Six-meter timed hop test time left leg z-score | Six-meter timed hop test time right leg z-score | Normalized single-leg hop test distance left leg z-score | Normalized single-leg hop test distance right leg z-score | Normalized triple hop test distance left leg z-score | Normalized triple hop test distance right leg z-score | Single-leg hop test distance LSI z-score | Triple hop test distance LSI z-score | Six-meter timed hop test time LSI z-score |
| 2   | Player 1            | 7.98                                   | 1.34                                       | 1.28                                        | 1.27                                                                  | 1.26                                                                   | 4.18                                                              | 4.36                                                               | 98.71                            | 95.86                        | 95.75                             | 0.69                                           | 0.69                                            | 1.65                                                     | 1.24                                                      | 2.18                                                 | 1.98                                                  | 0.58                                     | -0.10                                | -0.38                                     |
| 3   | Player 2            | 7.36                                   | 1.31                                       | 1.29                                        | 1.26                                                                  | 1.28                                                                   | 3.84                                                              | 4.07                                                               | 98.28                            | 94.43                        | 98.32                             | 1.18                                           | 0.92                                            | 1.46                                                     | 1.51                                                      | 0.48                                                 | 0.94                                                  | 0.43                                     | -0.55                                | 0.69                                      |
| 4   | Player 3            | 6.85                                   | 1.34                                       | 1.32                                        | 1.17                                                                  | 1.18                                                                   | 3.82                                                              | 3.81                                                               | 99.06                            | 99.56                        | 98.14                             | 0.68                                           | 0.66                                            | 0.22                                                     | 0.42                                                      | 0.39                                                 | 0.02                                                  | 0.69                                     | 1.09                                 | 0.61                                      |
| 5   | Player 4            | 7.05                                   | 1.35                                       | 1.39                                        | 1.05                                                                  | 1.08                                                                   | 3.40                                                              | 3.69                                                               | 97.57                            | 92.06                        | 97.48                             | 0.47                                           | -0.07                                           | -1.47                                                    | -0.74                                                     | -1.72                                                | -0.38                                                 | 0.20                                     | -1.31                                | 0.34                                      |
| 6   | Player 5            | 6.51                                   | 1.44                                       | 1.43                                        | 1.08                                                                  | 1.06                                                                   | 3.60                                                              | 3.54                                                               | 97.99                            | 98.19                        | 98.89                             | -1.06                                          | -0.44                                           | -1.06                                                    | -0.95                                                     | -0.70                                                | -0.92                                                 | 0.34                                     | 0.65                                 | 0.93                                      |
| 7   | Player 6            | 6.65                                   | 1.40                                       | 1.46                                        | 1.16                                                                  | 1.15                                                                   | 3.68                                                              | 3.65                                                               | 99.53                            | 99.40                        | 96.29                             | -0.36                                          | -0.75                                           | 0.04                                                     | 0.99                                                      | -0.34                                                | -0.51                                                 | 0.85                                     | 1.04                                 | -0.16                                     |
| 8   | Player 7            | 6.16                                   | 1.48                                       | 1.61                                        | 1.10                                                                  | 0.99                                                                   | 3.69                                                              | 3.33                                                               | 89.71                            | 90.32                        | 91.51                             | -1.66                                          | -2.34                                           | -0.76                                                    | -1.74                                                     | -0.28                                                | -1.66                                                 | -2.41                                    | -1.87                                | -2.16                                     |
| 9   | Player 8            | 7.02                                   | 1.45                                       | 1.36                                        | 1.17                                                                  | 1.18                                                                   | 3.82                                                              | 3.90                                                               | 98.59                            | 98.01                        | 93.80                             | -1.25                                          | 0.20                                            | 0.14                                                     | 0.42                                                      | 0.39                                                 | 0.36                                                  | 0.54                                     | 0.59                                 | -1.20                                     |
| 10  | Player 9            | 7.08                                   | 1.34                                       | 1.36                                        | 1.17                                                                  | 1.10                                                                   | 3.70                                                              | 3.87                                                               | 93.93                            | 95.62                        | 98.39                             | 0.68                                           | 0.19                                            | 0.18                                                     | -0.52                                                     | -0.22                                                | 0.25                                                  | -1.01                                    | -0.17                                | 0.72                                      |
| 11  | Player 10           | 7.10                                   | 1.34                                       | 1.32                                        | 1.13                                                                  | 1.17                                                                   | 3.71                                                              | 3.78                                                               | 96.36                            | 98.17                        | 98.14                             | 0.64                                           | 0.64                                            | -0.41                                                    | 0.27                                                      | -0.18                                                | -0.08                                                 | -0.20                                    | 0.64                                 | 0.61                                      |
| 12  | MEAN                | 1.38                                   | 1.38                                       | 1.16                                        | 1.15                                                                  | 1.15                                                                   | 3.74                                                              | 3.80                                                               | 96.97                            | 96.16                        | 96.67                             |                                                |                                                 |                                                          |                                                           |                                                      |                                                       |                                          |                                      |                                           |
| 13  | STDEV               | 0.06                                   | 0.10                                       | 0.07                                        | 0.09                                                                  | 0.09                                                                   | 0.20                                                              | 0.28                                                               | 3.02                             | 3.13                         | 2.39                              |                                                |                                                 |                                                          |                                                           |                                                      |                                                       |                                          |                                      |                                           |

Figure S12 Calculated z-scores for the six-meter timed hop test time separately for left and right legs, normalized single-leg hop test distance separately for left and right legs, normalized triple hop test distance separately for left and right legs, single-leg hop test distance LSI, triple hop test distance LSI, and six-meter timed hop test time LSI.

- Using the formula presented in Figure S13, calculate the Compound Hop Index, CHI for each athlete by averaging obtained z-scores for the six-meter timed hop test time separately for left and right legs, normalized single-leg hop test distance separately for left and right legs, normalized triple hop test distance separately for left and right legs, single-leg hop test distance LSI, triple hop test distance LSI, and six-meter timed hop test time LSI (Figure S14).

| P2 |                        |                                                  |                                                   |                                                                                |                                                                                 |                                                                            |                                                                             |                                        |                                    |                                            |                                                             |                                                              |                                                                          |                                                                           |                                                                  |                                                                       |                                                   |                                               |                                                    |     | =AVERAGE(P2:X2) |  |
|----|------------------------|--------------------------------------------------|---------------------------------------------------|--------------------------------------------------------------------------------|---------------------------------------------------------------------------------|----------------------------------------------------------------------------|-----------------------------------------------------------------------------|----------------------------------------|------------------------------------|--------------------------------------------|-------------------------------------------------------------|--------------------------------------------------------------|--------------------------------------------------------------------------|---------------------------------------------------------------------------|------------------------------------------------------------------|-----------------------------------------------------------------------|---------------------------------------------------|-----------------------------------------------|----------------------------------------------------|-----|-----------------|--|
|    | A                      | G                                                | H                                                 | I                                                                              | J                                                                               | K                                                                          | L                                                                           | M                                      | N                                  | O                                          | P                                                           | Q                                                            | R                                                                        | S                                                                         | T                                                                | U                                                                     | V                                                 | W                                             | X                                                  | Y   | Z               |  |
|    | Consecutive<br>players | Six-meter<br>timed hop test<br>time left leg [s] | Six-meter<br>timed hop test<br>time right leg [s] | Normalized<br>single-leg hop<br>test distance<br>left leg [m·m <sup>-1</sup> ] | Normalized<br>single-leg hop<br>test distance<br>right leg [m·m <sup>-1</sup> ] | Normalized<br>triple hop test<br>distance left leg<br>[m·m <sup>-1</sup> ] | Normalized<br>triple hop test<br>distance right leg<br>[m·m <sup>-1</sup> ] | Single-leg<br>hop test<br>distance LSI | Triple hop<br>test<br>distance LSI | Six-meter<br>timed hop<br>test time<br>LSI | Six-meter<br>timed hop<br>test time<br>left leg z-<br>score | Six-meter<br>timed hop<br>test time<br>right leg z-<br>score | Normalized<br>single-leg<br>hop test<br>distance<br>left leg z-<br>score | Normalized<br>single-leg<br>hop test<br>distance<br>right leg z-<br>score | Normalized<br>triple hop<br>test<br>distance left<br>leg z-score | Normalized<br>triple hop<br>test<br>distance<br>right leg z-<br>score | Single-leg<br>hop test<br>distance LSI<br>z-score | Triple hop<br>test<br>distance LSI<br>z-score | Six-meter<br>timed hop<br>test time<br>LSI z-score | CHI |                 |  |
| 1  |                        |                                                  |                                                   |                                                                                |                                                                                 |                                                                            |                                                                             |                                        |                                    |                                            |                                                             |                                                              |                                                                          |                                                                           |                                                                  |                                                                       |                                                   |                                               |                                                    |     | =AVERAGE(P2:X2) |  |
| 2  | Player 1               | 1.34                                             | 1.28                                              | 1.27                                                                           | 1.26                                                                            | 4.18                                                                       | 4.36                                                                        | 98.71                                  | 95.86                              | 95.75                                      | 0.69                                                        | 0.69                                                         | 1.65                                                                     | 1.24                                                                      | 2.18                                                             | 1.98                                                                  | 0.58                                              | -0.10                                         | -0.38                                              |     |                 |  |
| 3  | Player 2               | 1.31                                             | 1.29                                              | 1.26                                                                           | 1.28                                                                            | 3.84                                                                       | 4.07                                                                        | 98.28                                  | 94.43                              | 98.32                                      | 1.18                                                        | 0.92                                                         | 1.46                                                                     | 1.51                                                                      | 0.48                                                             | 0.94                                                                  | 0.43                                              | -0.55                                         | 0.69                                               |     |                 |  |
| 4  | Player 3               | 1.34                                             | 1.32                                              | 1.17                                                                           | 1.18                                                                            | 3.82                                                                       | 3.81                                                                        | 99.06                                  | 99.56                              | 98.14                                      | 0.68                                                        | 0.66                                                         | 0.22                                                                     | 0.42                                                                      | 0.39                                                             | 0.02                                                                  | 0.69                                              | 1.09                                          | 0.61                                               |     |                 |  |
| 5  | Player 4               | 1.35                                             | 1.39                                              | 1.05                                                                           | 1.08                                                                            | 3.40                                                                       | 3.69                                                                        | 97.57                                  | 92.06                              | 97.48                                      | 0.47                                                        | -0.07                                                        | -1.47                                                                    | -0.74                                                                     | -1.72                                                            | -0.38                                                                 | 0.20                                              | -1.31                                         | 0.34                                               |     |                 |  |
| 6  | Player 5               | 1.44                                             | 1.43                                              | 1.08                                                                           | 1.06                                                                            | 3.60                                                                       | 3.54                                                                        | 97.99                                  | 98.19                              | 98.89                                      | -1.06                                                       | -0.44                                                        | -1.06                                                                    | -0.95                                                                     | -0.70                                                            | -0.92                                                                 | 0.34                                              | 0.65                                          | 0.93                                               |     |                 |  |
| 7  | Player 6               | 1.40                                             | 1.46                                              | 1.16                                                                           | 1.15                                                                            | 3.68                                                                       | 3.65                                                                        | 99.53                                  | 99.40                              | 96.29                                      | -0.36                                                       | -0.75                                                        | 0.04                                                                     | 0.99                                                                      | -0.34                                                            | -0.51                                                                 | 0.85                                              | 1.04                                          | -0.16                                              |     |                 |  |
| 8  | Player 7               | 1.48                                             | 1.61                                              | 1.10                                                                           | 0.99                                                                            | 3.69                                                                       | 3.33                                                                        | 89.71                                  | 90.32                              | 91.51                                      | -1.66                                                       | -2.34                                                        | -0.76                                                                    | -1.74                                                                     | -0.28                                                            | -1.66                                                                 | -2.41                                             | -1.87                                         | -2.16                                              |     |                 |  |
| 9  | Player 8               | 1.45                                             | 1.36                                              | 1.17                                                                           | 1.18                                                                            | 3.82                                                                       | 3.90                                                                        | 98.59                                  | 98.01                              | 93.80                                      | -1.25                                                       | 0.20                                                         | 0.14                                                                     | 0.42                                                                      | 0.39                                                             | 0.36                                                                  | 0.54                                              | 0.59                                          | -1.20                                              |     |                 |  |
| 10 | Player 9               | 1.34                                             | 1.36                                              | 1.17                                                                           | 1.10                                                                            | 3.70                                                                       | 3.87                                                                        | 93.93                                  | 95.62                              | 98.39                                      | 0.68                                                        | 0.19                                                         | 0.18                                                                     | -0.52                                                                     | -0.22                                                            | 0.25                                                                  | -1.01                                             | -0.17                                         | 0.72                                               |     |                 |  |
| 11 | Player 10              | 1.34                                             | 1.32                                              | 1.13                                                                           | 1.17                                                                            | 3.71                                                                       | 3.78                                                                        | 96.36                                  | 98.17                              | 98.14                                      | 0.64                                                        | 0.64                                                         | -0.41                                                                    | 0.27                                                                      | -0.18                                                            | -0.08                                                                 | -0.20                                             | 0.64                                          | 0.61                                               |     |                 |  |
| 12 |                        | 1.38                                             | 1.38                                              | 1.16                                                                           | 1.15                                                                            | 3.74                                                                       | 3.80                                                                        | 96.97                                  | 96.16                              | 96.67                                      |                                                             |                                                              |                                                                          |                                                                           |                                                                  |                                                                       |                                                   |                                               |                                                    |     |                 |  |
| 13 |                        | 0.06                                             | 0.10                                              | 0.07                                                                           | 0.09                                                                            | 0.20                                                                       | 0.28                                                                        | 3.02                                   | 3.13                               | 2.38                                       |                                                             |                                                              |                                                                          |                                                                           |                                                                  |                                                                       |                                                   |                                               |                                                    |     |                 |  |
| 14 |                        |                                                  |                                                   |                                                                                |                                                                                 |                                                                            |                                                                             |                                        |                                    |                                            |                                                             |                                                              |                                                                          |                                                                           |                                                                  |                                                                       |                                                   |                                               |                                                    |     |                 |  |

Figure S13 The formula for calculating the Compound Hop Index, CHI for an athlete in a given team.

[illegible]

Figure S14 Compound Hop Index, CHI calculated for each athlete in a given team
